# Supplementary material
Source: publisher site journal article supplement (https://www.spandidos-publications.com/4229/downloadSupplementary)
Supplement: Supplementary file 1 [file downloadSupplementary]

## Sheet: Number of alterations-CNA
Table SIII. Number of alterations and acumulated length in Mb, total data show before and after applying an event cut-off ≥3 patients.
	Diffuse Gastric Cancer				Intestinal Gastric Cancer				Non-atrophic gastritis				Diffuse Gastric Cancer (cut-off ≥ 3)				Intestinal Gastric Cancer (cut-off ≥ 3)				Non-atrophic gastritis (cut-off ≥ 3)
Chromosome	Gains	Losses	Accumulated gain length (Mb)	Accumulated loss length (Mb)	Gains	Losses	Accumulated gain length (Mb)	Accumulated loss length (Mb)	Gains	Losses	Accumulated gain length (Mb)	Accumulated loss length (Mb)	Gains	Losses	Accumulated gain length (Mb)	Accumulated loss length (Mb)	Gains	Losses	Accumulated gain length (Mb)	Accumulated loss length (Mb)	Gains	Losses	Accumulated gain length (Mb)	Accumulated loss length (Mb)
1	327	75	177.9	21.35	121	148	37.18	33.78	20	26	0.31	0.54	64	9	16.35	2.13	17	32	3.4	6.21	6	3	0.01	0.04
2	236	33	141.46	6.77	68	89	15.22	17.67	0	23	0	0.34	49	3	13.34	0.53	6	19	1.07	3.24	0	3	0	0.03
3	133	74	55.06	26.04	78	60	16.29	17.56	6	22	0.24	0.15	30	15	6.7	11.41	12	12	1.96	8.38	0	4	0	0.02
4	44	155	12.54	40.8	20	100	3.4	19.74	14	20	0.48	0.36	10	36	1.83	6.37	5	33	0.96	6.24	10	9	0.27	0.3
5	38	148	11.21	74.23	105	66	26.39	21.78	5	18	0.1	0.41	6	31	1.3	19.18	32	20	5.44	10.63	0	3	0	0.14
6	40	96	14.41	24.29	26	66	4.98	17.76	3	28	0.02	0.4	2	23	0.4	6.9	2	19	0.33	8.9	1	5	0.002	0.04
7	100	58	29.35	17.69	111	89	40.72	29.49	21	27	0.2	0.24	18	12	2.89	6.95	15	23	2.21	13.48	8	8	0.03	0.03
8	307	40	176.19	8.32	365	59	139.8	21.05	18	25	1.11	0.54	85	4	20.62	0.53	103	17	27.73	9.4	11	1	0.01	0.001
9	133	31	47.73	6.57	68	32	13.56	6	1	14	0.01	0.26	36	5	7.86	1.16	11	8	1.75	1.18	0	3	0	0.02
10	121	65	53.63	15.69	61	42	17.18	8.24	4	20	0.12	0.79	23	5	5.77	1.1	10	10	2.39	1.77	1	4	0.1	0.12
11	118	31	33.03	15.68	65	28	19.53	13.97	4	26	0.05	0.57	33	7	6.35	4.64	16	5	2.63	1.14	2	2	0.04	0.05
12	113	63	54.01	19	42	55	10.46	11.98	3	24	0.05	0.23	19	16	4.68	3.18	6	8	1.06	2.09	0	7	0	0.04
13	115	12	37.66	2.85	77	19	19.4	3.29	8	6	0.05	0.05	28	1	5.16	0.11	15	4	2.24	0.59	5	1	0.04	0.01
14	40	49	11.66	11.42	44	69	9.8	18.2	10	15	3.02	0.51	6	1	0.83	0.1	5	8	0.94	1.63	3	4	0.02	0.39
15	51	22	13.32	5.12	27	38	6.5	8.1	0	10	0	0.25	14	0	2.43	0	6	8	1.17	1.4	0	4	0	0.01
16	49	29	20.41	8.94	30	31	7.61	7.16	14	13	0.4	0.89	7	4	1.75	0.48	3	2	0.56	0.22	8	7	0.06	0.1
17	14	60	5.67	13.08	25	41	4.94	8.3	13	15	0.97	1.86	2	1	0.33	0.12	1	2	0.19	0.24	9	5	0.037	0.049
18	27	32	7.68	14.38	28	19	7.43	2.71	4	4	0.12	0.03	5	6	0.91	1.36	5	5	0.71	0.75	0	0	0	0
19	20	44	6.67	20.97	11	41	2.7	11.96	1	8	0.01	0.09	0	0	0	0	1	6	0.14	4.63	0	0	0	0
20	107	2	93.65	0.31	81	16	41.75	3.2	2	4	0.04	0.08	18	1	3.25	0.11	13	2	3.24	0.28	0	0	0	0
21	2	16	0.39	3.7	5	10	0.82	1.79	0	4	0	0.02	0	2	0	0.64	0	1	0	0.11	0	4	0	0.02
22	7	45	1.46	12.45	10	27	1.82	5.69	15	14	0.21	0.12	1	3	0.21	0.31	0	1	0	0.2	7	1	0.04	0.01
X	168	10	71.46	2.99	58	66	13.5	167.1	207	87	1.2	0.47	60	6	12.17	1.07	24	22	7.79	7.69	125	58	0.3	0.13
Y	0	5	0	6.42	24	20	12.3	6.3	2	0	0.05	0	0	3	0	5.69	6	9	1.55	1.84	0	0	0	0
Sum	2310	1195	1076.55	379.06	1550	1231	473.28	462.82	375	453	8.76	9.2	516	194	115.13	74.07	314	276	69.46	92.24	196	136	0.959	1.55
Mean	96.25	49.7917	44.8562	15.7942	64.5833	51.2917	19.72	19.2842	15.625	18.875	0.365	0.383333	21.5	8.08333	4.79708	3.08625	13.0833	11.5	2.89417	3.84333	8.17	5.67	0.04	0.06
Min	0	2	0	0.31	5	10	0.82	1.79	0	0	0	0	0	0	0	0	0	1	0	0.11	0	0	0	0
Max	327	155	177.9	74.23	365	148	139.8	167.1	207	87	3.02	1.86	85	36	20.62	19.18	103	33	27.73	13.48	125	58	0.3	0.39
